# Supplementary material for: Epigenetic Adaptation Drives Monocyte Differentiation into Microglia-Like Cells Upon Engraftment into the Central Nervous System
Source: PubMed Central journal article supplement — bioRxiv. 2025 Jul 28:2024.09.09.612126. Originally published 2024 Sep 14. Preprint. [Version 2] doi: 10.1101/2024.09.09.612126 (PMC11419019; doi:10.1101/2024.09.09.612126), 2025-07-28

520  
521  
522  
523  
524  
525  
526  
527  
528  
529  
530  
531  
532  
533  
534  
535  
536  
537  
538  
539  
540  
541  
542  
543  
544  
545  
546  
547  
548  
549  
550

**Sup. Figure S1. mRNA expression of P2ry12, TMEM119, FCRLS, and IBA1 by blood monocytes, embryonic retinal microglia, and engrafted monocytes.**

The CX3CR1<sup>+GFP</sup> bone marrow transfer model was used to distinguish peripheral infiltrating monocytes from resident microglia. Naïve microglia cells and blood monocytes were collected from uninjured bone marrow transferred mice. Injured microglia and engrafted monocytes were collected from retinas 45 days after ocular injury in bone marrow transferred mice. Cells were collected using flow cytometry sorting with a gating strategy as follows: microglia: CD45<sup>+</sup> CD11b<sup>+</sup>GFP<sup>-negative</sup>CX3CR1/BV605<sup>+</sup>positive or CD45<sup>+</sup> CD11b<sup>+</sup> GFP<sup>-negative</sup>CX3CR1/APC<sup>+</sup>positive, blood monocyte and engrafted monocytes: CD45<sup>+</sup> CD11b<sup>+</sup> GFP<sup>+</sup>positiveCX3CR1/BV605<sup>+</sup>positive or GFP<sup>+</sup>positiveCX3CR1/APC<sup>+</sup>positive. RNA was isolated and mRNA expression of P2ry12, TMEM119, FCRLS and IBA1 genes was evaluated by PCR. P2ry12, TMEM119, and IBA1 mRNA level were normalized to blood monocyte, while the FCRLS mRNA level was normalized to naïve microglia. No FCRLS was detected in blood monocytes. This data indicates P2ry12, TMEM119, FCRLS, and IBA1 mRNA in engrafted monocytes is increased after retinal engraftment compared to blood monocytes.

**Sup. Figure S2. Circulating monocytes do not express microglia makers.**

Immunostaining of circulating blood monocytes from CX3CR1<sup>+GFP</sup>::CCR2<sup>+RFP</sup> transgenic mice shows absence of P2ry12, IBA1, and TMEM119 expression. MHC II staining is present in engrafted monocytes. *Scale bar = 20 μm*

**Sup. Figure S3. P2ry12 expression in engrafted monocyte at 14 days.**

The CX3CR1<sup>+GFP</sup>::CCR2<sup>+RFP</sup> bone marrow chimera model was employed to differentiate engrafted monocytes (GFP<sup>+</sup>CCR2<sup>+</sup>) from embryonic microglia (GFP<sup>-</sup> CCR2<sup>-</sup>). Peripheral monocytes acquired P2ry12 expression 14 days after engraftment into the retina. *Scale bar = 50 μm.*

551  
552  
553  
554  
555  
556  
557  
558  
559  
560

**Sup. Figure S4.** Protein expression of Iba1 in engrafted monocytes.

The CX3CR1<sup>+/GFP</sup>::CCR2<sup>+/RFP</sup> bone marrow chimera model was employed to differentiate engrafted monocytes from embryonic microglia. Eighty-five percent of engrafted GFP<sup>+</sup> monocytes become IBA1<sup>+</sup> at day 1 of infiltration, while all become IBA1<sup>+</sup> at 7 and 45 days post engraftment. *ns: Not significant. Yellow arrows indicate GFP<sup>-negative</sup> IBA1<sup>positive</sup> microglia cells and white arrows GFP<sup>positive</sup> engrafted monocytes. Scale bar = 50 μm.*

561  
562  
563

Sup. Figure S1

**Control:**

- Blood monocyte
- Naive retinal microglia

**Experimental eye injury:**

- 45 days post injury Retinal microglia
- 45 days post injury engrafted monocyte

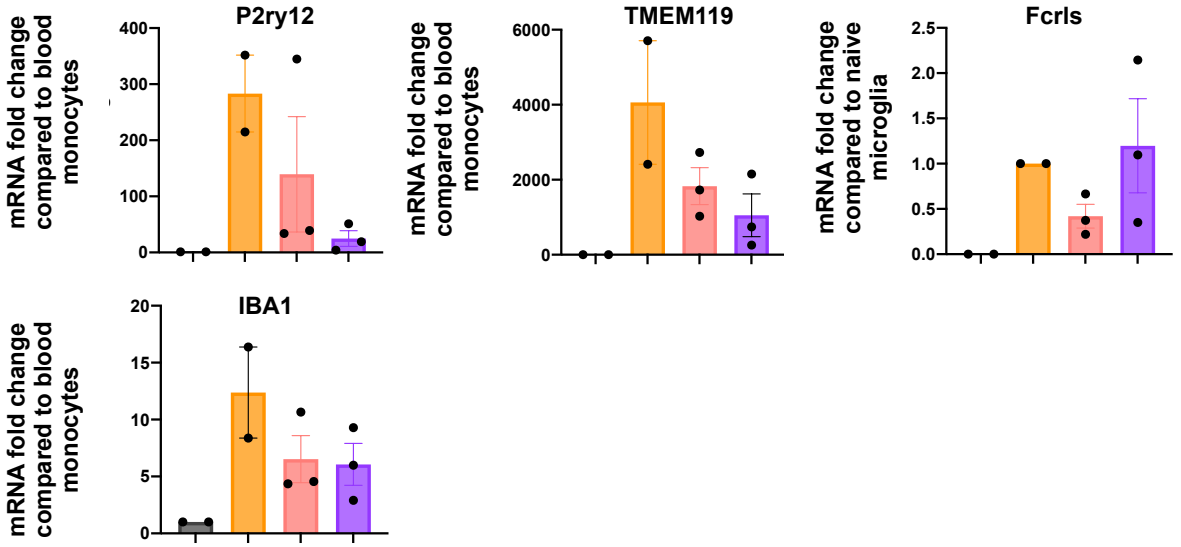

Sup. Figure S2

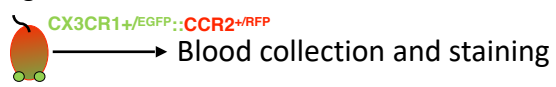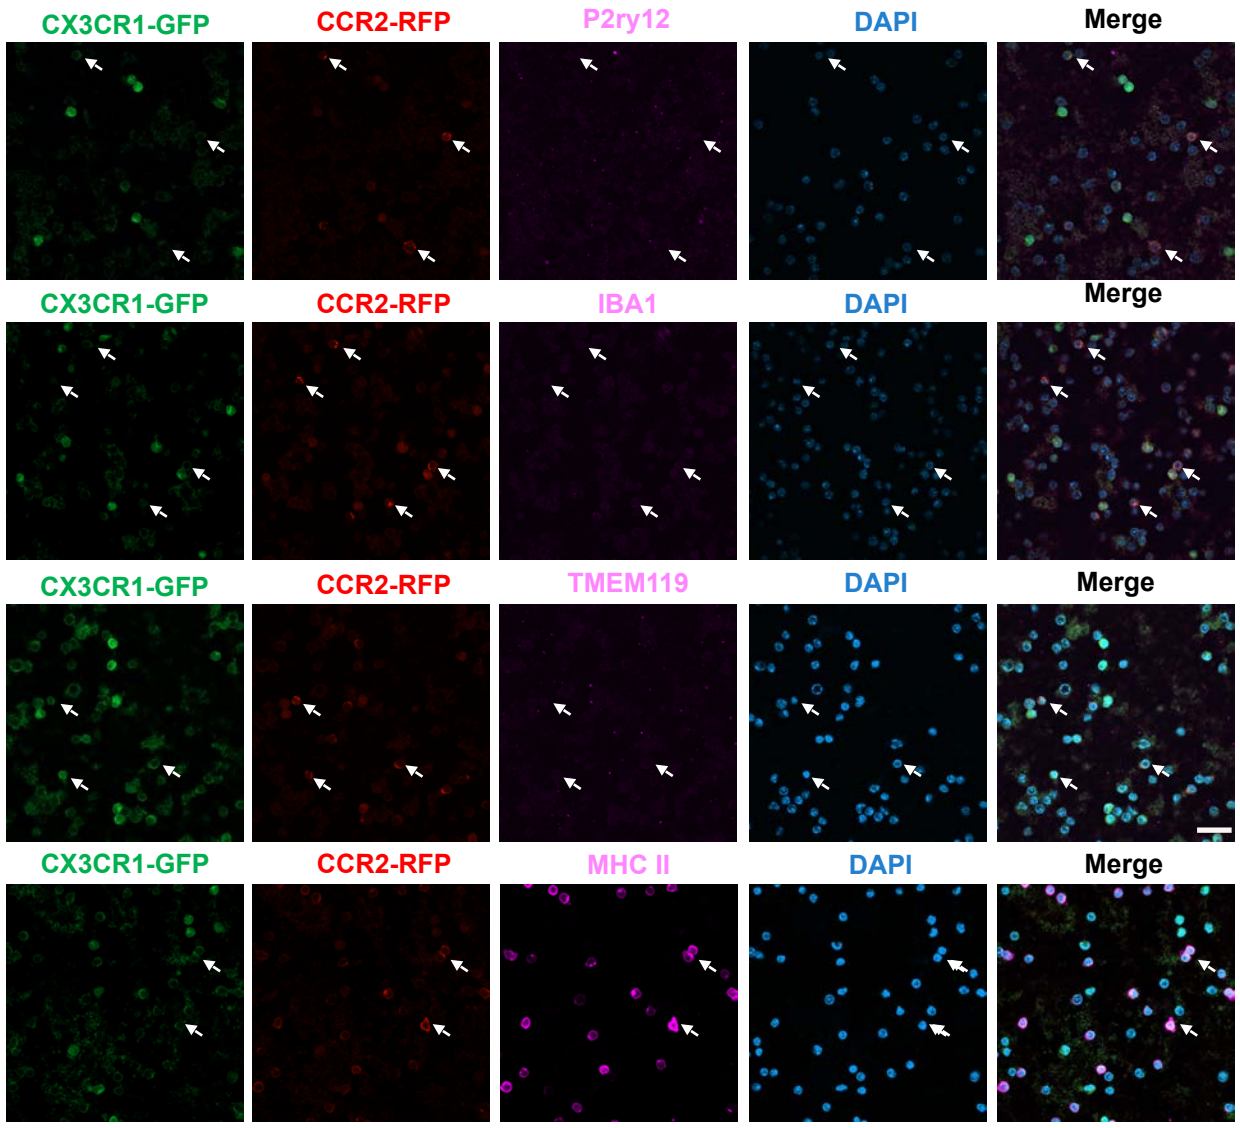

Sup. Figure S3

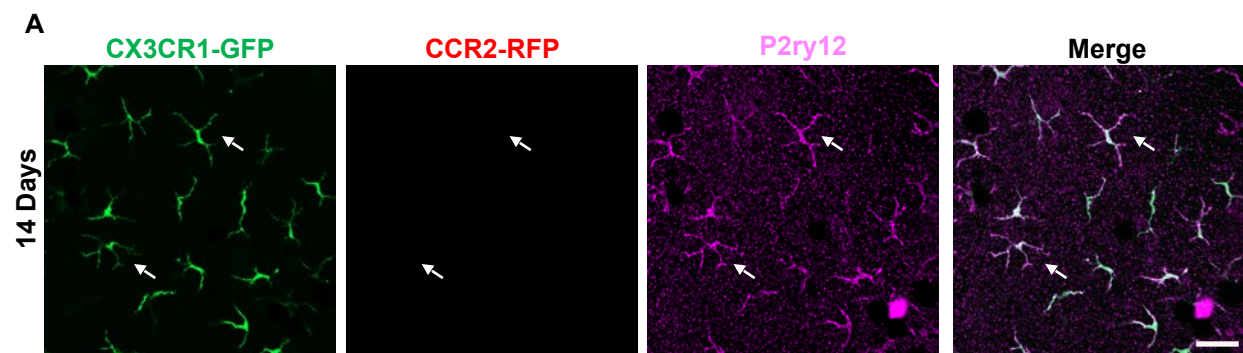

Sup. Figure S4

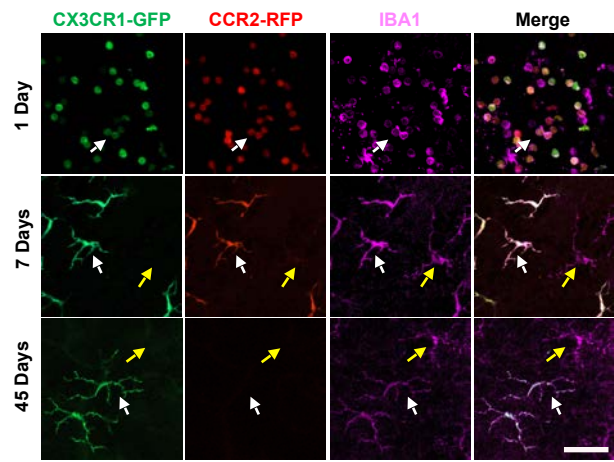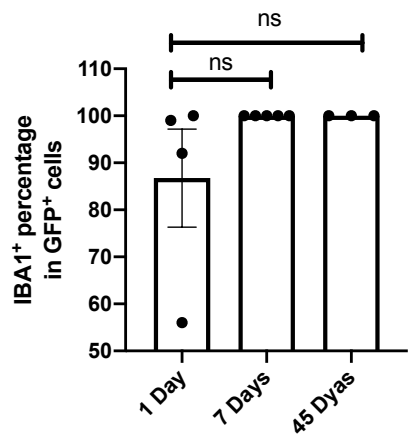

Supplement: NIHPP2024.09.09.612126V1-supplement-1.pdf [file NIHPP2024.09.09.612126V1-supplement-1.pdf]
